# Supplementary material for: NiS2 nanoparticles by the NaCl-assisted less-liquid reaction system for the magnesium-ion battery cathode
Source: Royal Society of Chemistry journal article supplement (doi:10.1039/d2nr06055h), 2022-12-15
Supplement: d2nr06055h1.pdf [file d2nr06055h1.pdf]

## Electronic Supplementary Information (ESI)

### NiS<sub>2</sub> Nanoparticles by NaCl Assisted Less-liquid Reaction System for Magnesium Ion Battery Cathode

Zijie Guo, Wutao Wei\*, Juan Shi, Pengpeng Wang, Zisen Ye and Liwei Mi\*

<sup>a</sup>. Henan Key Laboratory of Functional Salt Materials, Center for Advanced Materials Research, Zhongyuan University of Technology, Zhengzhou, 450007, Henan, PR China. E-mail: [mlwzzu@163.com](mailto:mlwzzu@163.com)

\*Corresponding author

Email address: 506952644@qq.com (W. T. Wei) [mlwzzu@163.com](mailto:mlwzzu@163.com) (L. W. Mi)

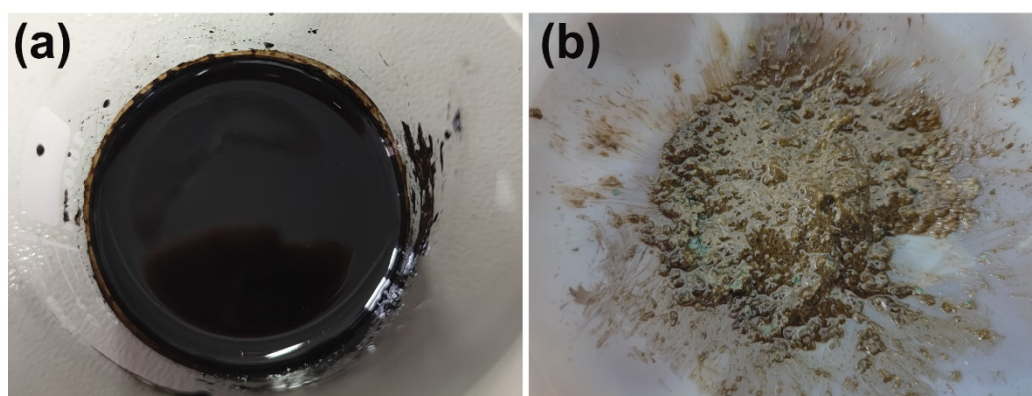

**Fig. S1** (a) Grinding state of NaCl, Na<sub>2</sub>S<sub>2</sub>O<sub>3</sub>·5H<sub>2</sub>O and Ni(NO<sub>3</sub>)<sub>2</sub>·6H<sub>2</sub>O at room temperature; (b) The grinding state of Na<sub>2</sub>S<sub>2</sub>O<sub>3</sub>·5H<sub>2</sub>O and Ni(NO<sub>3</sub>)<sub>2</sub>·6H<sub>2</sub>O without NaCl at room temperature.

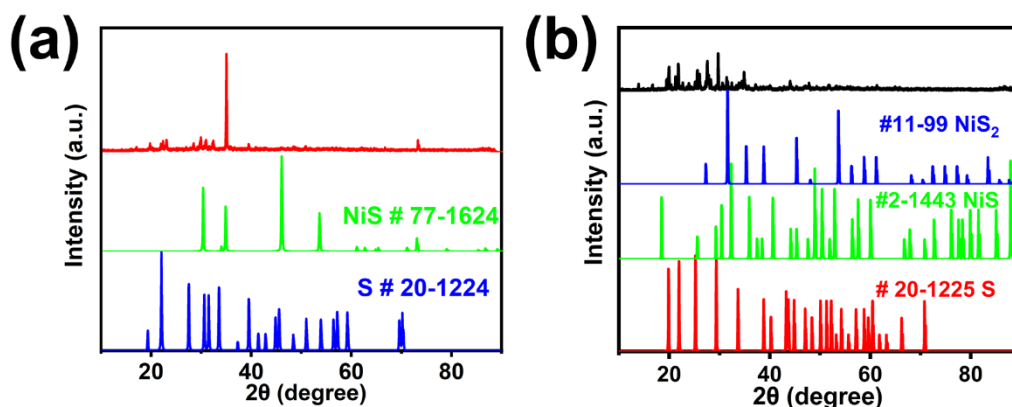

**Fig. S2** (a) XRD of NaCl, Na<sub>2</sub>S<sub>2</sub>O<sub>3</sub>·5H<sub>2</sub>O and Ni(NO<sub>3</sub>)<sub>2</sub>·6H<sub>2</sub>O in an open system at 60 °C; (b) XRD of Na<sub>2</sub>S<sub>2</sub>O<sub>3</sub>·5H<sub>2</sub>O and Ni(NO<sub>3</sub>)<sub>2</sub>·6H<sub>2</sub>O in an open system at 60 °C without NaCl.

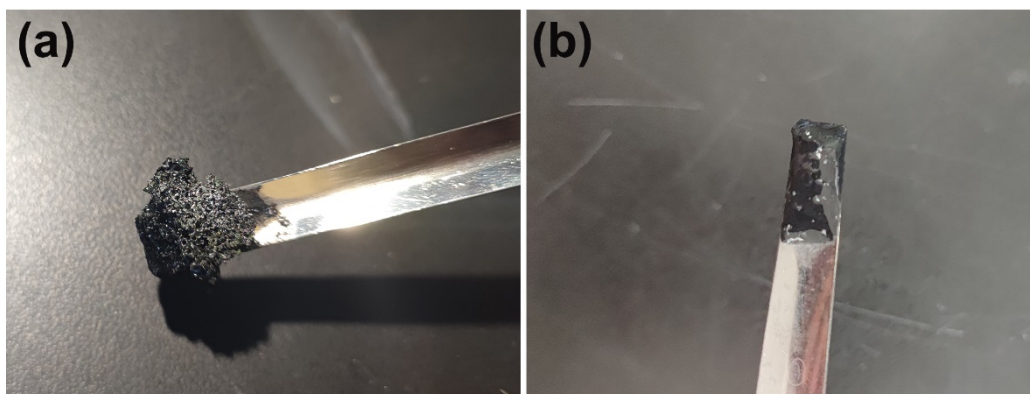

**Fig. S3** (a) Photo of NiS<sub>2</sub> material in the reactor after 12 h of reaction at 180 °C; (b) NiS<sub>2</sub>/NiS photo of the material in the reactor after 12 h of reaction at 180 °C.

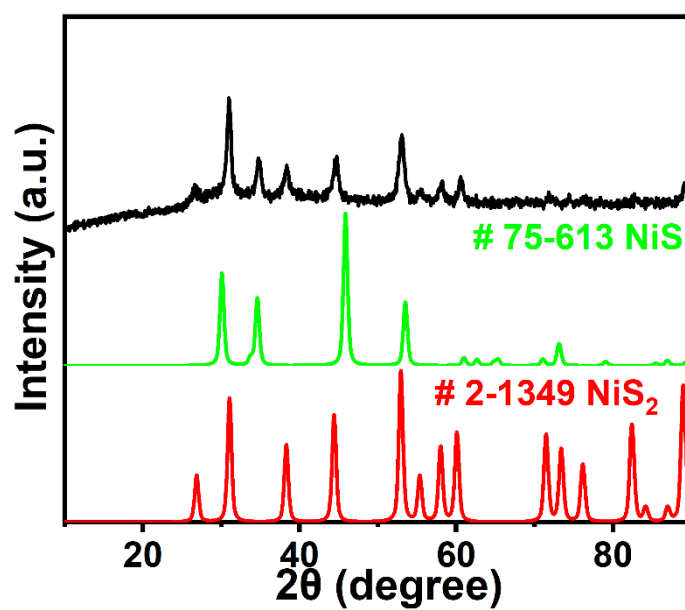

**Fig. S4** XRD patterns of samples prepared in the absence of NaCl.

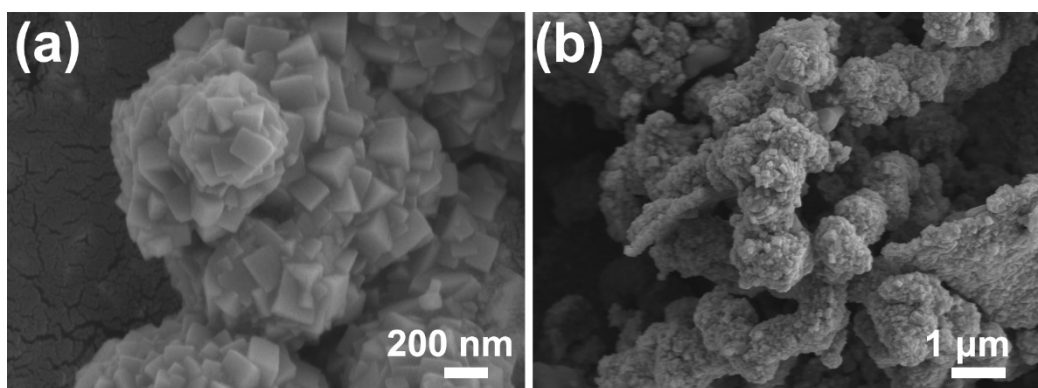

**Fig. S5** SEM of NiS<sub>2</sub>/NiS at different magnifications.

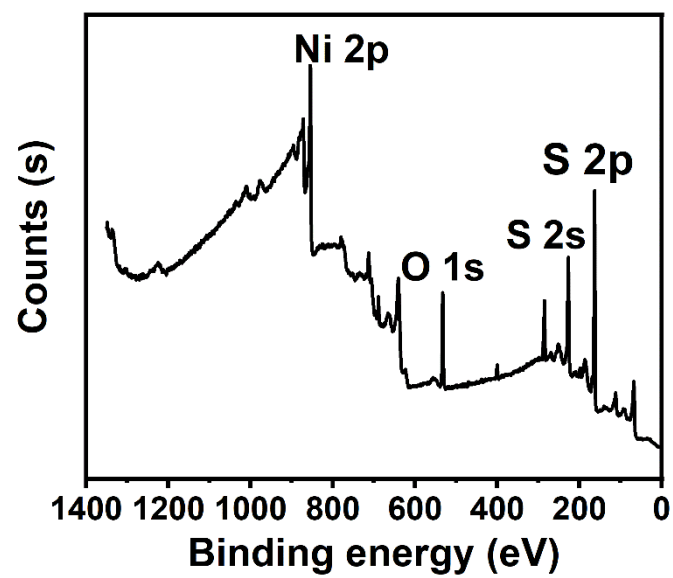

**Fig. S6** XPS survey spectra of NiS<sub>2</sub>-1.
